# Variation in mutation rates among human populations

Iain Mathieson<sup>1</sup>, David Reich<sup>1,2,3</sup>

3

<sup>1</sup> Department of Genetics, Harvard Medical School, Boston, Massachusetts 02115, USA.

<sup>2</sup> Broad Institute of MIT and Harvard, Cambridge, Massachusetts 02142, USA.

<sup>3</sup> Howard Hughes Medical Institute, Harvard Medical School, Boston, Massachusetts 02115, USA.

7

8

## Abstract

10

Mutations occur at vastly different rates across the genome, and between populations. Here, we measure variation in the mutational spectrum in a sample of human genomes representing all major world populations. We find at least two distinct signatures of variation. One, private to certain Native American populations, is novel and is concentrated at CpG sites. The other is consistent with a previously reported signature characterized by TCC>TTC mutations in Europeans and other West Eurasians. We describe the geographic extent of this signature and show that it is detectable in the genomes of ancient, but not archaic humans. We hypothesize that these two signatures are driven by independent processes and both result from differences in either the rate, or repair efficiency, of damage due to deamination of methylated bases – respectively guanine and cytosine for the two processes. Variation in these processes could be due to environmental, genetic, or life-history variation between populations, and dramatically affects the spectrum of rare variation in different populations.

21

## Introduction

23

For a process that provides such a fundamental contribution to genetic diversity, the human germline mutation rate is surprisingly poorly understood. Different estimates of the mutation rate—the mean number of mutations per-generation, or per-year—are largely inconsistent with each other [1,2], and similar uncertainty surrounds parameters such as the paternal age effect [3-5], the effect of life-history traits [6,7], and the sequence-context determinants of mutations [5,8]. Here, we investigate a related question. Rather than trying to determine the absolute values of parameters of the mutation rate, we ask how much the relative mutation rate—specifically, the relative rate of different classes of mutations—varies between different human populations.

Motivation for this comes from two sources. First, analysis of tumor genomes has demonstrated a number of different mutational signatures operating at different rates in somatic cells and cancers, many of which can be linked to specific biological processes or environmental exposures [9-11]. It seems plausible that population-specific genetic factors of environmental exposures might similarly lead to variation in germline mutation rates. Second, it is known that some mutations, most notably TCC>TTC, are enriched in Europeans relative to East Asians and Africans [8] though the geographical extent, history, and biological basis for this signal are unclear. By analyzing whole-genome sequence data from diverse world populations, together with high coverage ancient genomes, we aimed to further characterize variation in human mutation rates, to place this variation in a historical context, and to determine the underlying biological or environmental explanations.

## Results

We first analyzed data from 300 individuals sequenced to high coverage (mean coverage depth 43X) as part of the Simons Genome Diversity project [12] (SGDP). We classified single nucleotide polymorphisms (SNPs) into one of 96 mutational classes according to the SNP, and the two flanking bases. We represent these by the ancestral sequence and the derived base so for example “ACG>T” represents the ancestral sequence 3’-ACG-5’ mutating to 3’-ATG-5’. In order to increase power to detect population-specific variation, we first focused on variants where there were exactly two copies of the derived allele in the sample ( $f_2$  variants). For each individual, we counted the number of  $f_2$  mutations in each mutational class that they carried, and normalized by the number of ATA>C mutations (the most common class and one that did not seem to vary across populations in a preliminary analysis). The residual mutation intensities form a 96×300 matrix, and we used non-negative matrix factorization [10,13] (NMF, implemented in the *NMF* package [14] in R) to identify specific mutational features. NMF decomposes a matrix into a set of sparse factors, here putatively representing different mutational processes, and individual-specific loadings for each factor, measuring the intensity of each process in each individual.

NMF requires us to specify the number of signatures (the factorization rank) in advance. For  $f_2$  variants we chose a factorization rank of 4, based on standard diagnostic criteria (Supplementary Fig. 1). This identified four mutational signatures; of which two were uncorrelated with each other, were robust across frequencies, replicated in non-cell-line samples, were consistent across samples from the same populations, and had clear geographic distributions (Figure 1, Supplementary Fig. 2). Signature 1 corresponds to the previously described European signal [8] characterized by TCC>T, ACC>T, CCC>T and TCT>T (possibly also including CCG>T, which overlaps with signature 2). Loadings of this component almost perfectly separate West Eurasians from

64 other populations, with South-West Asians intermediate. This component is seen most strongly in Western and  
65 Mediterranean Europe, with decreasing intensity in Northern and Eastern Europe, the Middle East and South-west  
66 Asia. This signal is similar to signature 11 from the COSMIC catalog of somatic mutation in cancer [15] (Pearson  
67 correlation  $\rho=0.85$ ) which is most commonly found in melanoma and glioblastoma and is associated with use of  
68 chemotherapy drugs which act as alkylating agents, damaging DNA through guanine methylation.

69

70 Signature 2 is restricted to some South and Central American populations and, possibly, Aboriginal  
71 Australians. It is characterized by NCG>T mutations similar to the signature caused by deamination of methylated  
72 cytosine at CpG sites, corresponding to COSMIC signature 1 ( $\rho=0.96$ ). Interestingly, this signal is found in South  
73 America in Andean populations like Quechua and Piapoco, and in Central American populations such as Mayan  
74 and Nahua, but not in the Amazonian Surui and Karitiana, nor in North American populations.

75

76 The remaining two signatures are more difficult to identify (Supplementary Fig. 2). Signature 3 is  
77 characterized by GT>GG mutations, particularly GTG>GGG. It is found in some East Asian and some South  
78 American populations but is not consistent within populations and does not have a consistent geographic pattern.  
79 All affected samples are derived from cell lines. It does not match any mutational signature seen in COSMIC  
80 (maximum  $\rho=0.05$ ). Plausibly this represents some as-yet uncharacterized sample-specific process or cell-line  
81 artifact. Signature 4 is diffuse, possibly representing a background mutation rate and is most correlated with  
82 COSMIC signature 5 ( $\rho=0.52$ ) which is found in all cancers and has unknown aetiology. It is significantly  
83 reduced in only a single cell-line derived sample (Quechua-2), so probably represents some unknown cell-line or  
84 data processing artifact.

85

86 We checked that these signatures were robust when we looked at different frequencies and factorization  
87 ranks. For  $f_3$  variants with rank 4 we recovered the same signatures as with  $f_2$  variants (Supplementary Fig. 3), and  
88 retained signatures 1 and 2 when we used rank 3 (Supplementary Fig. 4). At  $f_l$  the variation is apparently  
89 dominated by cell line artifacts because principal component analysis (PCA) separates cell line from non cell line  
90 derived samples (Supplementary Fig. 5A). However, NMF on  $f_l$  variants excluding cell line derived samples  
91 recovers signatures consistent with signatures 1 and 2 (Supplementary Fig. 5B-C). PCA on  $f_2$  variants does not  
92 distinguish cell line samples, but does separate samples by geographic region, and recovers factor loadings  
93 consistent with NMF-derived signatures 1-3 (Supplementary Fig. 6). To check that our results were not an artifact  
94 of the normalization we used, we repeated the analysis normalizing by the total number of mutations in each  
95 sample, rather than the number of ATA>C mutations, and obtained equivalent results (Supplementary Figure 7).

96

Demographic effects such as population size changes confound direct estimates of mutation rate differences. However, the proportion of mutations likely attributable to signature 1 (i.e TCT>T, TCC>T, CCC>T and ACC>T) increases from a mean of 7.8% in Africans to 10.0% (range 8.8-11.1%) in West Eurasians which, with the strong assumption that the only differences in mutation are the ones we detected, would provide a lower-bound for the increase in genome-wide mutation rate of 2.3% (range 1.1-3.6%). A similar calculation for American samples with apparent excess of signature 2 gives a range of increase of 4.9-10.8%.

We replicated these results using data from phase 3 of the 1000 Genomes project [16], confirming that mutations consistent with signature 1 are enriched in populations of European and South Asian ancestry (Figure 2A) and that mutations consistent with signature 2 are enriched in Peruvians (PEL) and Mexicans (MXL) – the two 1000 Genomes populations with the most Native American ancestry (Figure 2B).

To study the time depth of these signals, we investigated whether signature 1 could be detected in ancient samples by constructing a corrected statistic that measures the intensity of the mutations enriched in signature 1, normalized to reduce spurious signals that arise from ancient DNA damage (methods). This statistic is enriched to European levels in both an eight thousand year old European hunter-gatherer and a seven thousand year old Early European Farmer [17] but not in a 45,000 year old Siberian [18], nor in the Neanderthal [19] or Denisovan[20] genomes (Figure 3). This statistic is predicted by neither estimated hunter-gatherer ancestry, nor early farmer ancestry, in 31 samples from 13 populations for which ancestry estimates were available [17] (linear regression p-values 0.22 and 0.15, respectively). Thus the effect is not strongly driven by this division of ancestry. If it has an environmental basis, it is not predicted by latitude (linear regression of signature 1 loadings against latitude;  $p=0.68$ ), but is predicted by longitude ( $p=6\times 10^{-8}$ ; increasing east to west). We cannot apply the same approach to Signature 2, because post-mortem deamination of methylated CpG sites is common in all ancient DNA, even when treated with uracil-DNA glycosylase [21].

Finally, we investigated the dependence of the two signatures on four genomic features. First we investigated dependence on transcriptional strand. Signature 1 shows a skew whereby the C>T mutation is more likely to occur on the transcribed (i.e. noncoding) strand in West Eurasians, relative to populations from other regions (Figure 4 A&B). Because transcription coupled repair is more likely to repair mutations on the transcribed strand [22] this result, consistent with Harris (2015) [8], suggests that the excess signature 1 mutations in West Eurasians are driven more by G>A than by C>T mutations. Signature 2 shows a global skew where the C>T mutation is more likely to occur on the untranscribed strand, consistent with these mutations resulting from deamination of methylated cytosine, and we do not see a significant difference between individuals with high versus low levels of signature 2 mutations (Figure 4 C,D). Second, we obtained methylation data for a testis cell

line, produced by the Encyclopedia of DNA Elements (ENCODE) project [23]. Signature 2 mutations are ~8.5 times as likely to occur in regions of high ( $\geq 50\%$ ) versus low ( $< 50\%$ ) methylation. We do not detect any difference in this ratio between regions, or between individuals with high versus low signature 2 mutation rates, although the number of mutations involved is probably too low to provide much power (Methods; Fisher's exact test  $P=0.14$ ). Third, we tested dependence on  $B$  statistic [24], a measure of conservation. We found that the relative magnitudes of both signatures 1 and 2 depend on  $B$  statistic, but that both these dependencies were independent of the per-population intensities of the signatures (Figure 5 A,B). This, along with a similar result for recombination rate, (Figure 5 C,D) confirm that the differences we detect are truly due to differences in mutation rate, and not some other force like natural selection, recombination or biased gene conversion.

## Discussion

We characterized two independent signals of variation in mutation rates between human populations, however this may not be comprehensive. Our power to detect differences in mutation rates depends on a number of factors, including sample size, and the level of background variation. For example, we would expect to have more power to detect recent variations in Native Americans because they have relatively low background variation. Nonetheless, it is clear that the patterns we did identify are robust, and represent real differences in mutation rates.

We cannot be definitive about the causes of these patterns, but our analyses provide a number of clues. In terms of the immediate mutagenic cause, signature 1 is most similar to COSMIC [15] signature 11 (Pearson correlation  $\rho=0.85$ ), which is associated with alkylating agents used as chemotherapy drugs, damaging DNA through guanine methylation. The reversal of transcriptional strand bias for this signature in West Eurasians supports the idea that the increased rate of these mutations in West Eurasians is driven by damage to guanine bases, consistent with deamination of methyl-guanine to adenine, leading to the G>A (equivalently C>T) mutations that we observe. Signature 1 is also highly correlated with COSMIC signature 7 ( $\rho=0.76$ ), caused by ultraviolet (UV) radiation exposure but it is difficult to imagine how this could affect the germline, would not explain our observed increase in ACC>T mutations, would not be expected to reverse the strand bias, and should produce an enrichment of CC>TT dinucleotide mutations in West Eurasians that we do not observe ( $p=0.41$ ). Harris (2015) [8] suggested that UV might cause germline mutations indirectly through folate deficiency in populations with light skin pigmentation (since folate can be degraded in skin by UV radiation). It is unknown what mutational signature would be caused by this effect, but the fact that we do not observe enrichment of signature 1 in other lightly pigmented populations like Siberians suggests that it is not driving the signal.

164

165       Signature 2 seems most likely to be driven by deamination of methylated cytosine at CpG sites, which is  
166 the major source of C>T mutations at these sites. We find no evidence of any qualitative difference between the  
167 CpG mutations in populations with high rates of signature 2 compared to other populations. Therefore we  
168 hypothesize that variation in both signatures is driven by differences either in methylation (of guanine and  
169 cytosine, respectively) level, rate of deamination of methylated bases, or in the efficiency of repair of damage  
170 caused by deamination of methylated bases.

171

172       Why these factors would vary between populations is another question and, for this study, a matter for  
173 speculation. Possibilities include variation in life-history traits, variation in environment, or systematic variation  
174 in mutational or DNA repair processes due to either natural selection or neutral evolution. Over longer timescales,  
175 variation in life history traits, for example the timing of reproduction and the onset of fertility, can lead to  
176 variation in both total mutation rate and in the mutational spectrum, particularly in the relative rates of CpG and  
177 non-CpG mutations [1,6,7,25,26]. While these effects are dramatic and important on the timescale of hominid  
178 evolution, we do not think that variation in life-history traits drives the variation that we observed within humans.  
179 First, we see little variation within African populations, despite great social and cultural diversity across the  
180 populations represented in our study. Second, variation in signature 1 across Eurasia seems very smooth (Figure  
181 1B) and we know of no life-history traits that vary so smoothly across populations. Signature 2 varies less  
182 smoothly, and the relative rate of CpG mutations is known to be affected by life-history traits, although the  
183 magnitude of the signal seems too large. For example, in the 1000 Genomes project, the proportion of rare C>T  
184 mutations at CpG sites (a lower bound for the difference in mutation rate) varies by up to ~5% across populations  
185 (Figure 2 B), on the same order as the difference in the proportion of CpG substitutions between human and  
186 baboon lineages [26]. Studies of *de novo* mutations in humans have found no significant effect of paternal age on  
187 CpG:non-CpG mutation ratio [4,5], but we cannot exclude the possibility that variation in signature 2 is driven by  
188 dramatic variation in some other life history trait.

189

190       Other than life-history traits, damage or repair rates might vary either because of inherited variation in  
191 DNA repair efficiency or other biochemical processes, or because of external environmental factors. In the first  
192 case, a promising approach to detecting a causal locus would be to map mutation rate variation, either in large  
193 pedigrees or in an admixed population like African Americans. In the second, we might identify the factor by  
194 looking for correlations with environmental features, through mutation accumulation experiments in other  
195 species, or comparison with mutational signatures identified in cancer with known causes. So far, however, the  
196 ultimate cause of this variation remains unknown.

197

198 It is important to understand changes in the mutation rate on the timescale of hominid evolution in order  
 199 to calibrate demographic models of human evolution [27] and the observation of variation in mutation rates  
 200 *between* populations [8] made this calibration even more complicated. One further consequence of our results is  
 201 that the rate of CpG mutations, often assumed to be almost “clock-like” [7,25,26] may also vary over short  
 202 timescales, meaning that they may not be as useful for model calibration as previously thought. Further work in  
 203 this area will involve more detailed measurement of mutation rates in diverse populations – to date, most work on  
 204 somatic, cancer, or *de novo* germline mutations has been conducted in populations of West Eurasian origin – and  
 205 the extension of these approaches to other populations will be required to fully understand variation in mutation  
 206 rates and its consequences for demographic modeling.

207

## 208 **Methods**

209

### 210 **Identifying mutational signatures**

211

212 We used SNPs called in 300 individuals from the Simons Genome Diversity Project [12] (SGDP).  
 213 Variant sites were called at filter level 1, and then any site that was variable in any sample was genotyped in every  
 214 sample. We polarized SNPs with the ancestral allele inferred in the human-chimp ancestor, and classified by the  
 215 two flanking bases in the human reference (hg19). We restricted to sites of given frequencies and merged reverse  
 216 complement classes to give counts of SNPs occurring in 96 possible mutational classes. We then normalized these  
 217 counts by the frequency of ATA>ACA mutations. The remaining matrix represents the normalized intensity of  
 218 each mutation class in each sample, relative to the sample with the lowest intensity. Formally, let  $C_{ij}$  be the  
 219 counts of mutations in class  $i$  for sample  $j$ . Then, the intensities that we analyze,  $X_{ij}$  are given by,

220

$$221 \quad X_{ij} = \frac{C_{ij}}{C_{\{ATA>C\}j}}$$

222

223 We decomposed this matrix  $X$  using non-negative matrix factorization [13] implemented in the *NMF* R  
 224 package [14] with the multiplicative algorithm introduced by Lee & Seung (1999) [13], initialized using the non-  
 225 negative components from the output of a *fastICA* analysis[28] implemented in the *fastICA* package in R  
 226 (<https://cran.r-project.org/web/packages/fastICA/index.html>). For the diagnostic plots in Supplementary Fig. 2,  
 227 we used 200 random starting points to compare the results of different runs. When we initialized the matrix  
 228 randomly, rather than using *fastICA*, we obtained a slightly closer fit to the data (root-mean-squared error in  $X$  of  
 229 0.024 vs 0.025) and similar factor distributions (Supplementary Fig. 8A), except that all signatures were



dominated by CpG mutations (Supplementary Fig. 8B). Removing a constant amount of each CpG mutation from each signature recovered signatures close to the *fastICA*-initialized signatures (Supplementary Fig. 8C), so we concluded that this was a model-fitting artifact, and did not reflect true signatures. Finally we performed the analysis on a matrix normalized by the total number of mutations in each sample  $\sum_i C_{ij}$  rather than the number of ATA>C mutations. (Supplementary Figure 7).

235

The ordering of the factors is arbitrary so, where necessary, we reordered for interpretability. To plot mutational signatures and compare with the COSMIC signatures, we rescaled the intensities of each class according to the trinucleotide frequencies in the human reference genome. The scale of the weightings is therefore not easily interpretable. To perform principal component analysis on  $X$ , we normalized so that the variance of each row was equal to 1.

241

## 242 Analysis of 1000 Genomes data

243

We classified 1000 Genomes mutations according to the ancestral allele inferred by the 1000 Genomes project, and counted the number of  $f_2$  and  $f_3$  variants carried by each individual in each mutation class. We ignored SNPs that were multi-allelic or where the ancestral state was not confidently assigned (confident assignment shown by a capital letter in the “AA” tag in the “INFO” field of the vcf file). We excluded the four outlying samples: HG01149(CLM), NA20582 & NA20540 (TSI), NA12275(CEU), NA19728(MXL).

249

## 250 Analysis of ancient genomes

251

We identified heterozygous sites in five ancient genomes from published vcf files, and restricted to sites where there was a single heterozygote in the SGDP. The corrected signature 1 log-ratio is defined by

254

$$M = \log_2 \left\{ \frac{X_{\{TCC>A\}j} X_{\{ACC>A\}j} X_{\{TCT>A\}j} X_{\{CCC>A\}j}}{X_{\{TCA>A\}j} X_{\{ACA>A\}j} X_{\{TCA>A\}j} X_{\{CCA>A\}j}} \right\}$$

256

and then normalized so that the distribution in African populations has mean 0 and standard deviation 1. We estimated bootstrap quantiles by resampling the counts  $C_{ij}$  for the ancient samples and recomputing  $M$ .

259

260

261



## 262 **Transcriptional strand**

263

264 We downloaded the knownGenes table of the UCSC genes track from the UCSC genome browser  
 265 (<http://genome.ucsc.edu/>). Taking the union of all transcripts in this table, we classified each base of the genome  
 266 according to whether it was transcribed on the + or – strand, both, or neither (including uncalled bases). These  
 267 regions totaled 607Mb, 637Mb, 36Mb and 1,599Mb of sequence respectively. We then counted mutations in our  
 268 dataset that occurred in regions that were transcribed on the + or – strand, ignoring regions where both or neither  
 269 strand was transcribed.

270

## 271 **Methylation status**

272

273 We downloaded the Testis\_BC 1 and 2 (two technical replicates from the same sample) tables from the  
 274 HAIB Methyl RRBS track from the UCSC genome browser (<http://genome.ucsc.edu/>). We constructed a list of  
 275 33,305 sites where both replicates had  $\geq 50\%$  methylation and another list of 166,873 sites where both replicates  
 276 had  $< 50\%$  methylation. We then classified the CpG mutations in our dataset according to which, if either, of these  
 277 lists they fell into. Ultimately, there were only 1186 classified mutations in the whole dataset, including 43 in  
 278 Native American samples and 12 in Native American samples with high rates of signature 2. Therefore, although  
 279 we found no significant interactions between methylation status and population, it may be simply that we lack  
 280 power to detect it.

281

## 282 ***B* statistic and recombination rate**

283

284 We classified each base of the genome according to which decile of *B* statistic [24] or HapMap 2  
 285 combined recombination rate [29] (in 1kb blocks) it fell into and counted mutations in each class.

286

## 287 **Code availability**

288 Scripts used to run the analysis are available from <https://github.com/mathii/spectrum>.

289

## 290 **Acknowledgments**

291 We thank Mark Lipson and Priya Moorjani for helpful comments. I.M. was supported by a long-term  
 292 fellowship from the Human Frontier Science Program LT001095/2014-L. D.R. is a Howard Hughes Medical  
 293 Institute investigator.

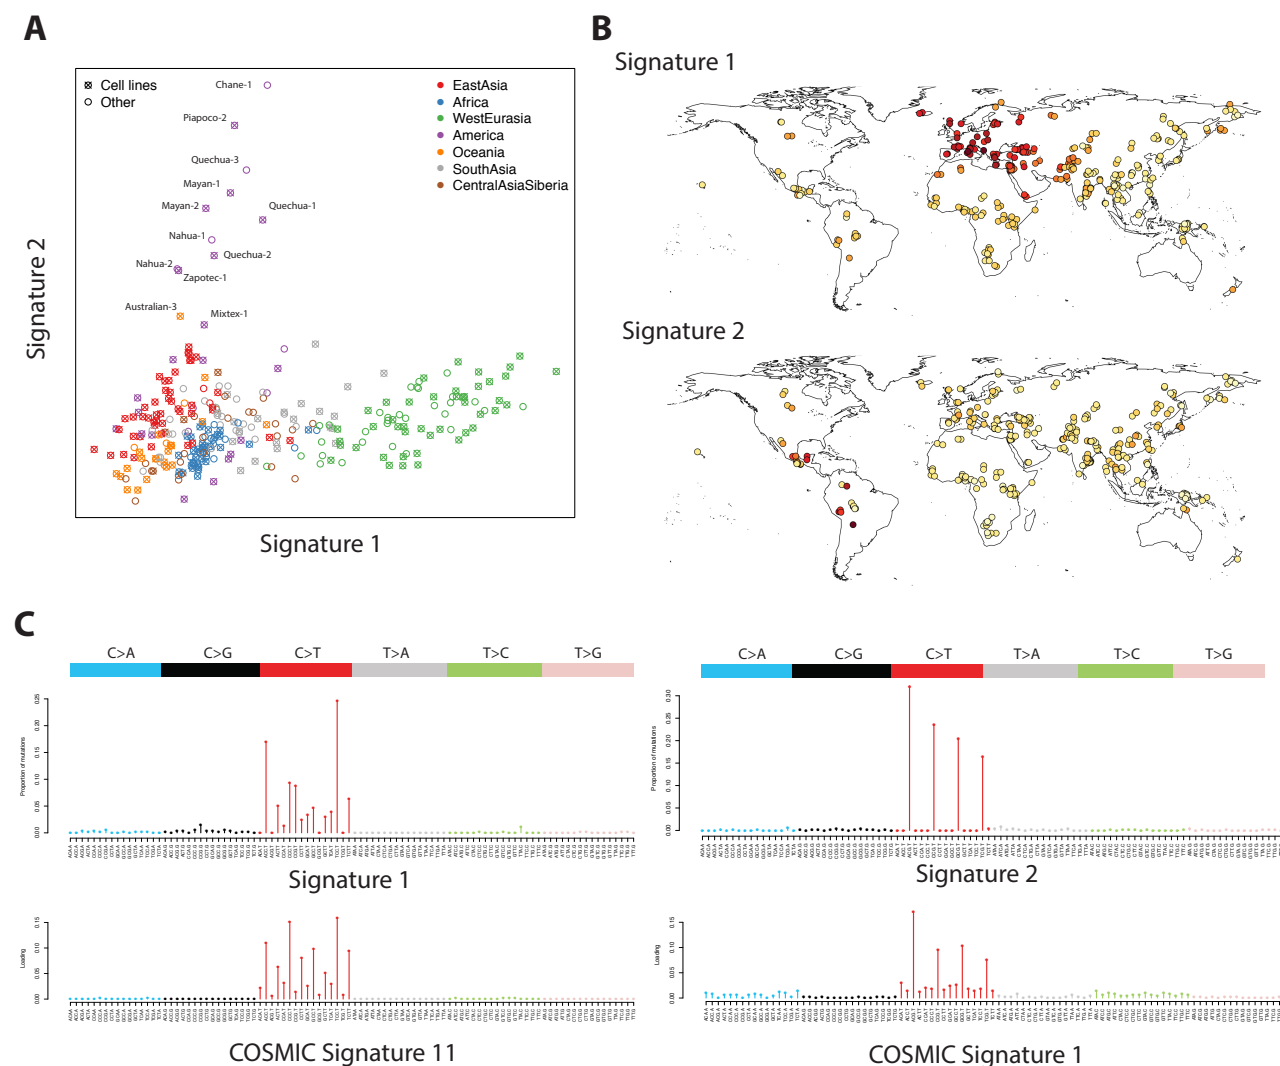

294

295 **Figure 1:** Distribution and characterization of mutational signatures 1 and 2. **A:** Factor coefficients for these two  
296 signatures, for 300 individual samples colored by region. **B:** Geographic representation of the factor loadings from  
297 panel A. Darker colors represent higher loadings. **C:** Characterization of the signatures in terms of mutation  
298 intensity for each of 96 possible classes. Bars are scaled by the frequency of each trinucleotide in the human  
299 reference genome. Below, the most highly correlated signatures from the COSMIC database are shown for  
300 comparison.

301

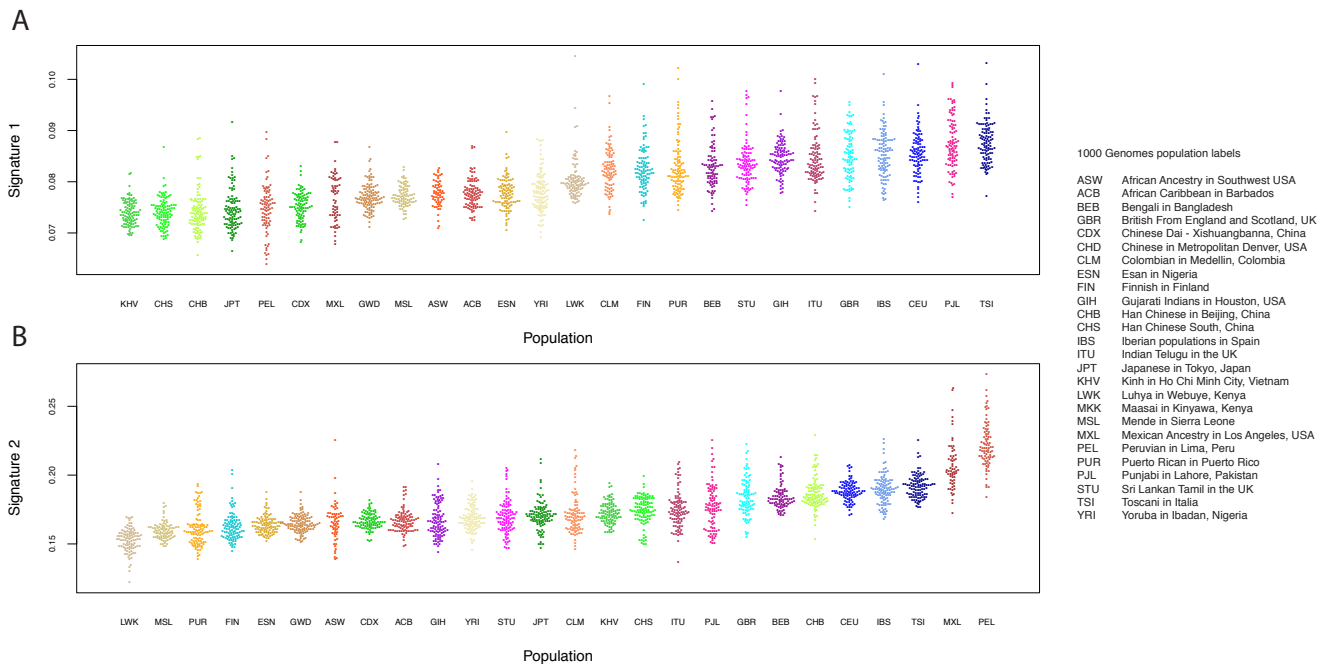

302  
303 **Figure 2:** Signatures 1 and 2 in the 1000 Genomes. **A:** Proportions of  $f_2$  and  $f_3$  variants in signature 1 (here  
304 defined as TCT>T, TCC>T, CCC>T and ACC>T) in each 1000 Genomes individual, by population. **B:**  
305 Proportions of  $f_2$  and  $f_3$  variants in signature 2 (here defined as NCG>T, for any N) in each 1000 Genomes  
306 individual, by population (five outlying samples excluded).

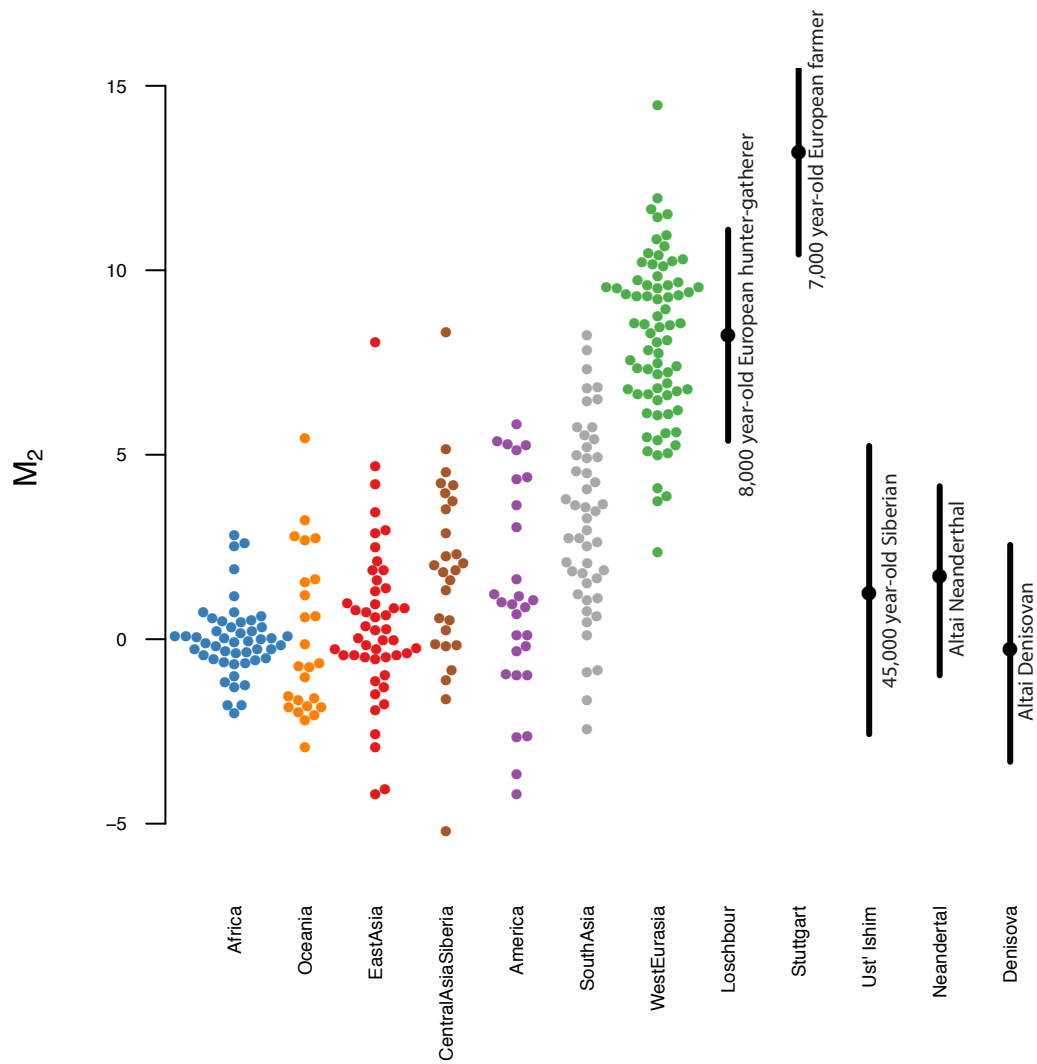

307

308 **Figure 3:** Signature 1, corrected to be more robust to ancient DNA damage (Methods), for  $f_2$  variants in the SGDP  
 309 individuals, by region, and in five high coverage ancient genomes. Solid lines show 5-95% bootstrap quantiles.

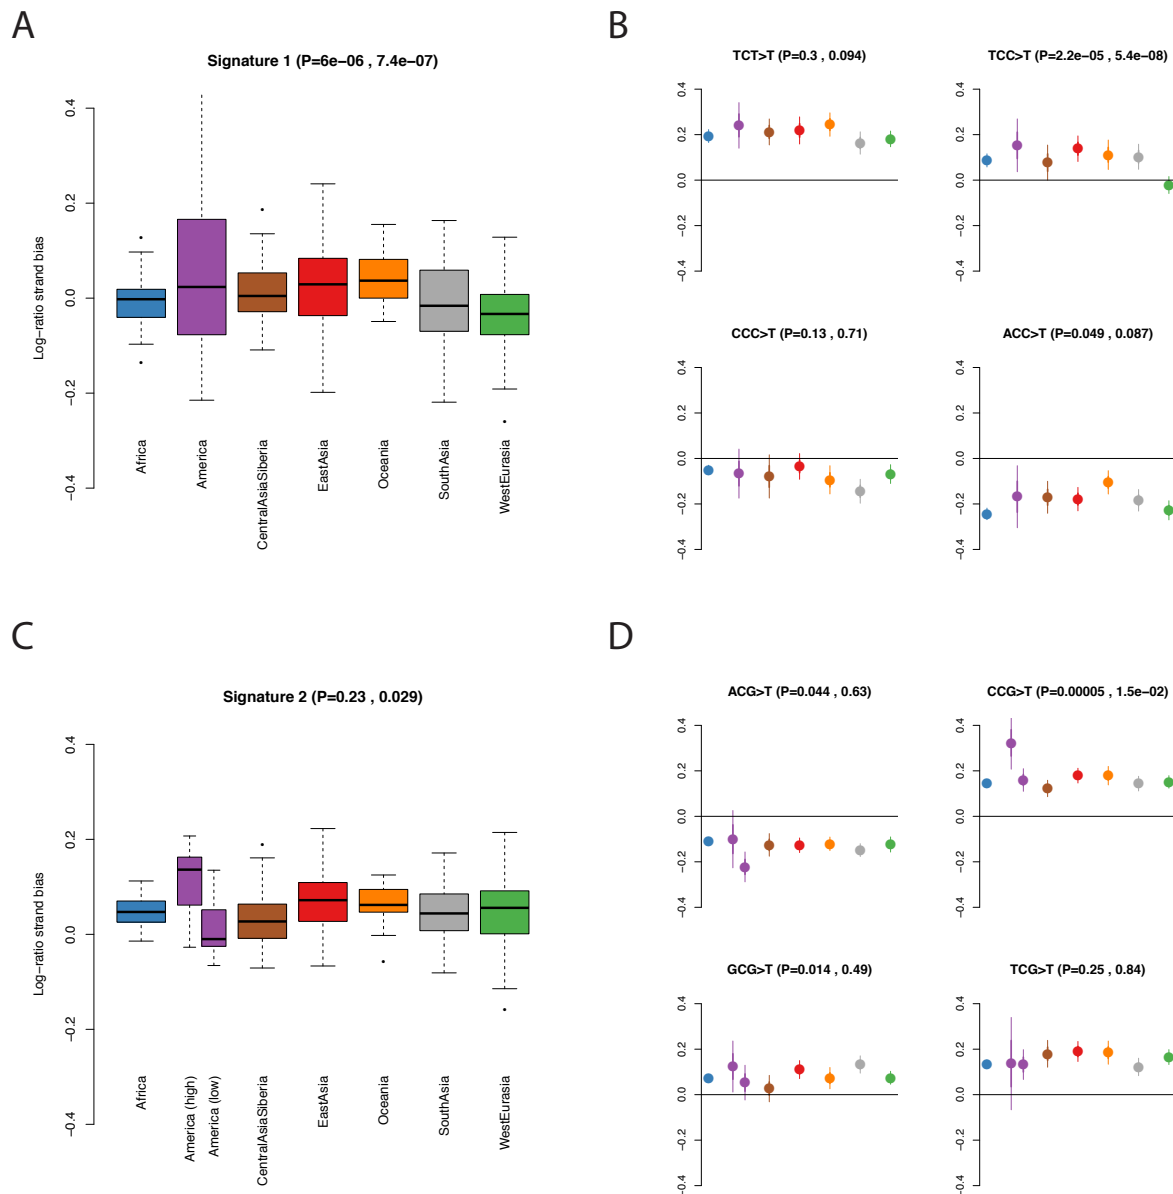

310  
311 **Figure 4:** Transcriptional strand bias in mutational signatures. We plot the log of the ratio of mutations occurring  
312 on the untranscribed versus transcribed strand. Therefore a positive value indicates that the C>T mutation is more  
313 common than the G>A mutation on the untranscribed (i.e. coding) strand. P values in brackets are, respectively,  
314 ANOVA P-values for a difference between regions and t-test P-values for a difference between **i)** West Eurasia  
315 and other regions (excluding South Asia) in A&B **ii)** 11 American samples with high rates of signature 2  
316 mutations and other regions in C&D. **A:** Boxplot of per-individual strand bias for mutations in signature 1  
317 (TCT>T, TCC>T, CCC>T and ACC>T). One sample (S\_Mayan-2) with an extreme value (0.48) is not shown. **B:**  
318 Population-level means for each of the mutations comprising signature 1. **C,D:** as A&B but for signature 2. We  
319 separated out the 11 American samples with high rates of signature 2 mutations.

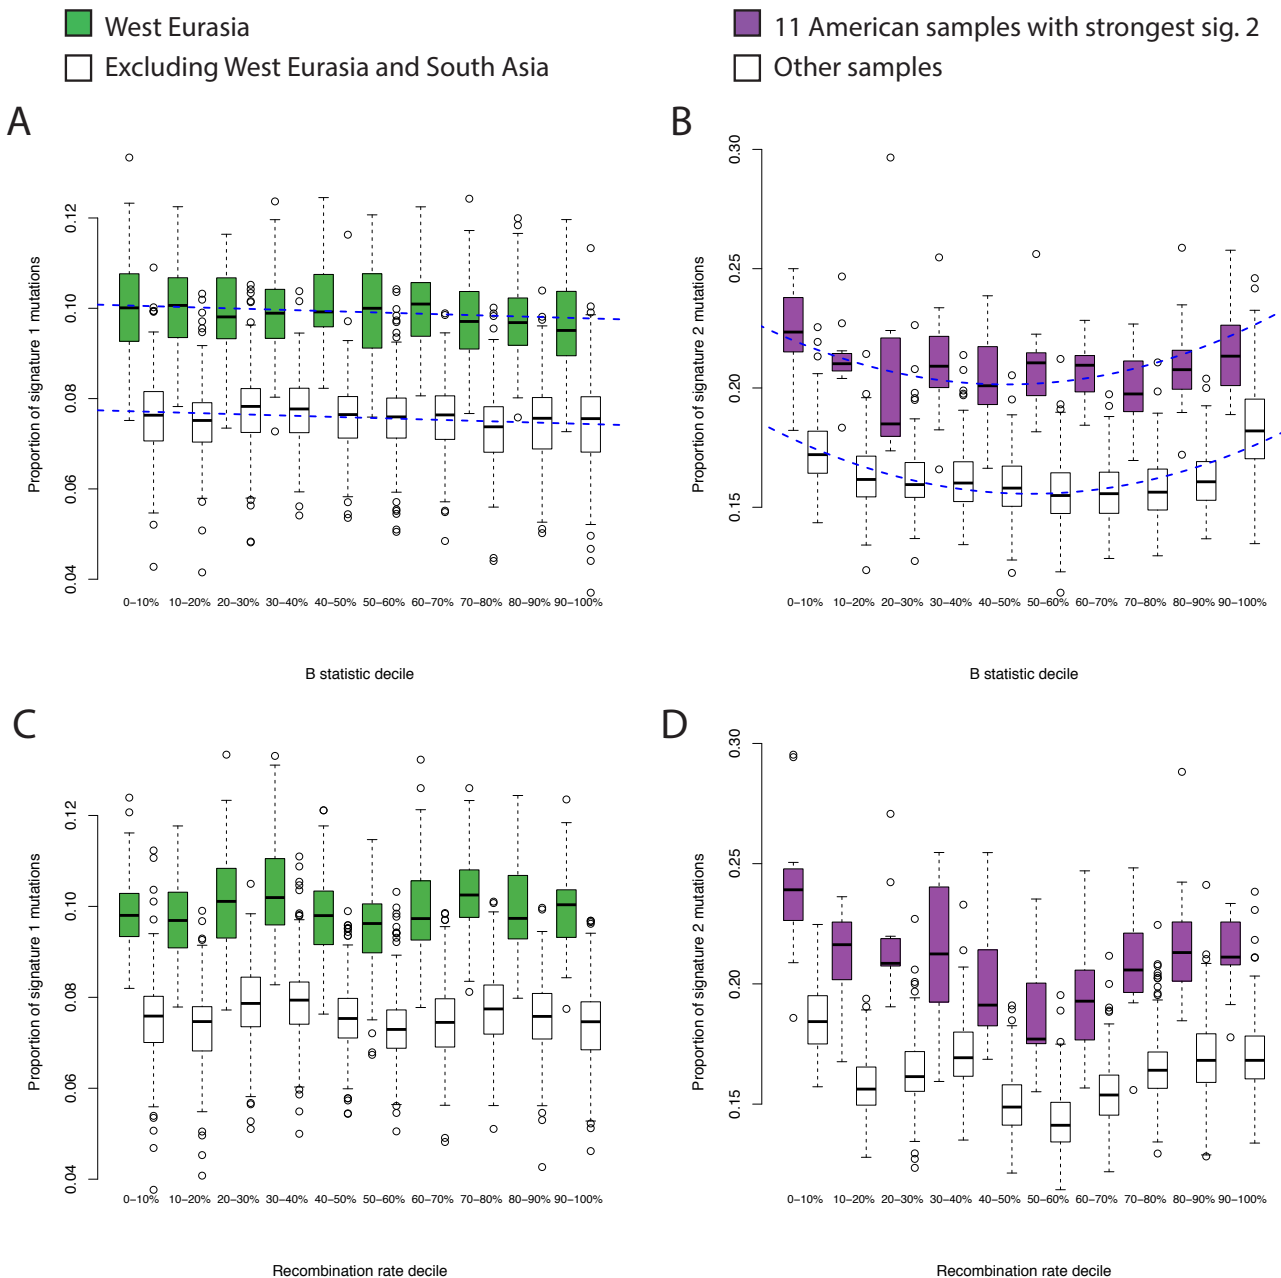

320

321 **Figure 5:** Dependence of mutational signatures on genomic features. **A,B:** dependence on conservation, measured  
322 by *B* statistic (0=lowest *B* statistic; highest conservation). **A:** Comparison of proportions of signature 1 mutations  
323 between West Eurasia and other populations (excluding South Asia). Blue dashed lines show a fitted linear model  
324 of dependence with no interaction term. **B:** Comparison of proportions of signature 2 mutations between the 11  
325 American samples with the highest proportions, and all other samples. Blue dashed lines show a fitted quadratic  
326 model of dependence with no interaction term. **C,D:** As A&B, but showing dependence on recombination rate  
327 decile computed in 1kb bins.

## 328 References

329

- 330 1. Segurel L, Wyman MJ, Przeworski M (2014) Determinants of mutation rate variation in the human germline.  
331 *Annu Rev Genomics Hum Genet* 15: 47-70.
- 332 2. Scally A (2016) Mutation rates and the evolution of germline structure. *Philos Trans R Soc Lond B Biol Sci*  
333 371.
- 334 3. Genome of the Netherlands C (2014) Whole-genome sequence variation, population structure and demographic  
335 history of the Dutch population. *Nat Genet* 46: 818-825.
- 336 4. Kong A, Frigge ML, Masson G, Besenbacher S, Sulem P, et al. (2012) Rate of de novo mutations and the  
337 importance of father's age to disease risk. *Nature* 488: 471-475.
- 338 5. Rahbari R, Wuster A, Lindsay SJ, Hardwick RJ, Alexandrov LB, et al. (2016) Timing, rates and spectra of  
339 human germline mutation. *Nat Genet* 48: 126-133.
- 340 6. Amster G, Sella G (2016) Life history effects on the molecular clock of autosomes and sex chromosomes. *Proc*  
341 *Natl Acad Sci U S A* 113: 1588-1593.
- 342 7. Gao Z, Wyman MJ, Sella G, Przeworski M (2016) Interpreting the Dependence of Mutation Rates on Age and  
343 Time. *PLoS Biol* 14: e1002355.
- 344 8. Harris K (2015) Evidence for recent, population-specific evolution of the human mutation rate. *Proc Natl Acad*  
345 *Sci U S A* 112: 3439-3444.
- 346 9. Alexandrov LB, Nik-Zainal S, Wedge DC, Aparicio SA, Behjati S, et al. (2013) Signatures of mutational  
347 processes in human cancer. *Nature* 500: 415-421.
- 348 10. Alexandrov LB, Nik-Zainal S, Wedge DC, Campbell PJ, Stratton MR (2013) Deciphering signatures of  
349 mutational processes operative in human cancer. *Cell Rep* 3: 246-259.
- 350 11. Behjati S, Huch M, van Boxtel R, Karthaus W, Wedge DC, et al. (2014) Genome sequencing of normal cells  
351 reveals developmental lineages and mutational processes. *Nature* 513: 422-425.
- 352 12. Mallick S, Li H, Lipson M, Mathieson I, Gymrek M, et al. (2016) The landscape of human genome diversity.  
353 In press.
- 354 13. Lee DD, Seung HS (1999) Learning the parts of objects by non-negative matrix factorization. *Nature* 401:  
355 788-791.
- 356 14. Gaujoux R, Seoighe C (2010) A flexible R package for nonnegative matrix factorization. *BMC*  
357 *Bioinformatics* 11: 367.
- 358 15. Forbes SA, Beare D, Gunasekaran P, Leung K, Bindal N, et al. (2015) COSMIC: exploring the world's  
359 knowledge of somatic mutations in human cancer. *Nucleic Acids Res* 43: D805-811.
- 360 16. Genomes Project C, Auton A, Brooks LD, Durbin RM, Garrison EP, et al. (2015) A global reference for  
361 human genetic variation. *Nature* 526: 68-74.
- 362 17. Lazaridis I, Patterson N, Mitnik A, Renaud G, Mallick S, et al. (2014) Ancient human genomes suggest three  
363 ancestral populations for present-day Europeans. *Nature* 513: 409-413.
- 364 18. Fu Q, Li H, Moorjani P, Jay F, Slepchenko SM, et al. (2014) Genome sequence of a 45,000-year-old modern  
365 human from western Siberia. *Nature* 514: 445-449.
- 366 19. Prufer K, Racimo F, Patterson N, Jay F, Sankararaman S, et al. (2014) The complete genome sequence of a  
367 Neanderthal from the Altai Mountains. *Nature* 505: 43-49.
- 368 20. Meyer M, Kircher M, Gansauge MT, Li H, Racimo F, et al. (2012) A high-coverage genome sequence from  
369 an archaic Denisovan individual. *Science* 338: 222-226.
- 370 21. Briggs AW, Stenzel U, Meyer M, Krause J, Kircher M, et al. (2010) Removal of deaminated cytosines and  
371 detection of in vivo methylation in ancient DNA. *Nucleic Acids Res* 38: e87.
- 372 22. Green P, Ewing B, Miller W, Thomas PJ, Program NCS, et al. (2003) Transcription-associated mutational  
373 asymmetry in mammalian evolution. *Nat Genet* 33: 514-517.
- 374 23. Consortium EP (2012) An integrated encyclopedia of DNA elements in the human genome. *Nature* 489: 57-  
375 74.



- 376 24. McVicker G, Gordon D, Davis C, Green P (2009) Widespread genomic signatures of natural selection in  
377 hominid evolution. PLoS Genet 5: e1000471.
- 378 25. Kim SH, Elango N, Warden C, Vigoda E, Yi SV (2006) Heterogeneous genomic molecular clocks in  
379 primates. PLoS Genet 2: e163.
- 380 26. Hwang DG, Green P (2004) Bayesian Markov chain Monte Carlo sequence analysis reveals varying neutral  
381 substitution patterns in mammalian evolution. Proc Natl Acad Sci U S A 101: 13994-14001.
- 382 27. Scally A, Durbin R (2012) Revising the human mutation rate: implications for understanding human  
383 evolution. Nat Rev Genet 13: 745-753.
- 384 28. Hyvärinen A (1999) Fast and Robust Fixed-Point Algorithms for Independent Component Analysis. IEEE  
385 Transactions on Neural Networks 10.
- 386 29. International HapMap Consortium (2005) A haplotype map of the human genome. Nature 437: 1299-1320.  
387

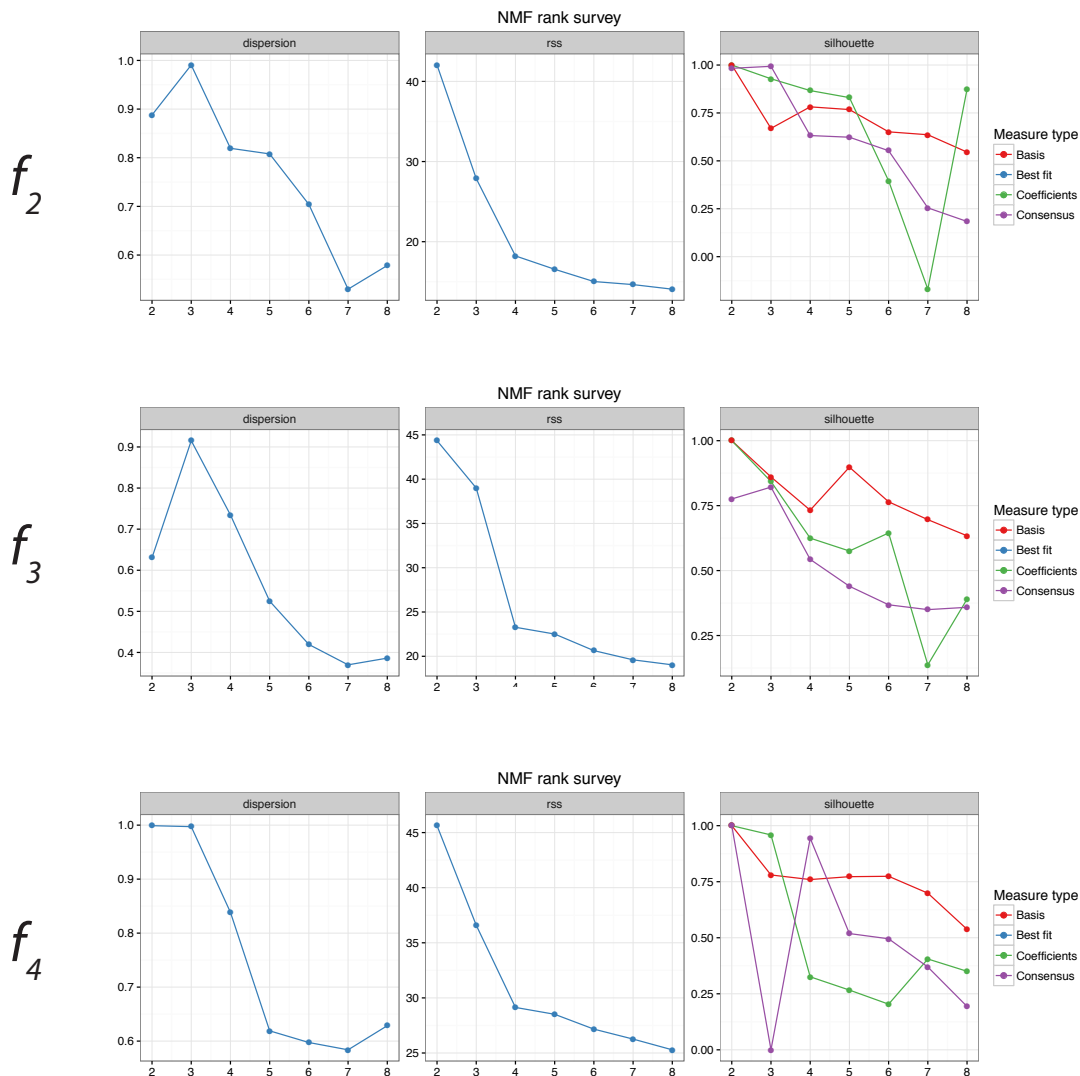

388

389 **Supplementary Figure 1:** Diagnostic plots for NMF using variants of different frequencies. Rows from top-  
390 variants at frequency 2, 3 and 4. Columns- each plot shows the value of a measure, computed over 50 random  
391 start points, for factorization ranks from 2 to 8. From left to right: Dispersion, a measure of reproducibility of  
392 clusters across runs (1=perfectly reproducible); Residual sum of squares (lower=better fit); Silhouette, a measure  
393 of how reliably elements can be assigned to clusters (1=perfectly reliably). In supplementary plots, we denote the  
394 signatures obtained from  $f_r$  variants with rank  $k$  by signature<sub>r,k</sub>, so the signatures in the main text are equivalent to  
395 signature<sub>2,4</sub>.

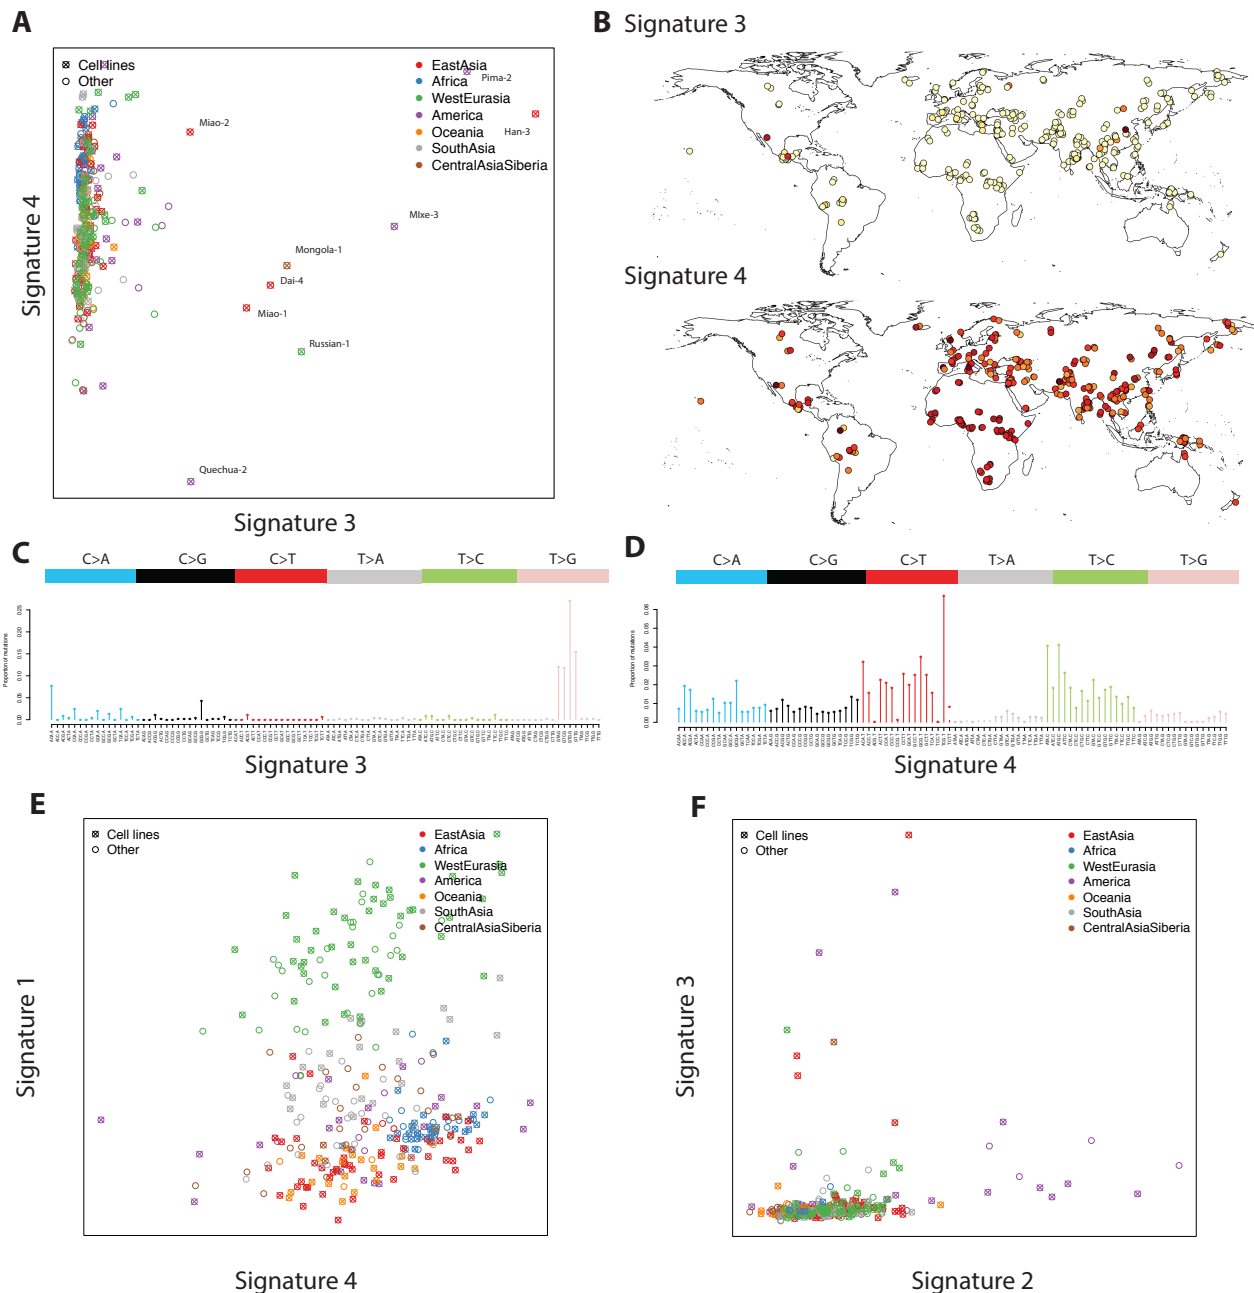

396

397 **Supplementary Figure 2:** Distribution and characterization of mutational signatures<sub>2,4</sub> 3 and 4. **A:** Per-sample  
 398 coefficients for signatures 3 and 4. **B:** Geographic distribution of signatures 3 and 4. **C:** Mutational spectrum of  
 399 signature 3. **D:** Mutational spectrum of signature 4. **E-F:** Comparison of loadings of 1 and 2 with signatures 3 and  
 400 4.

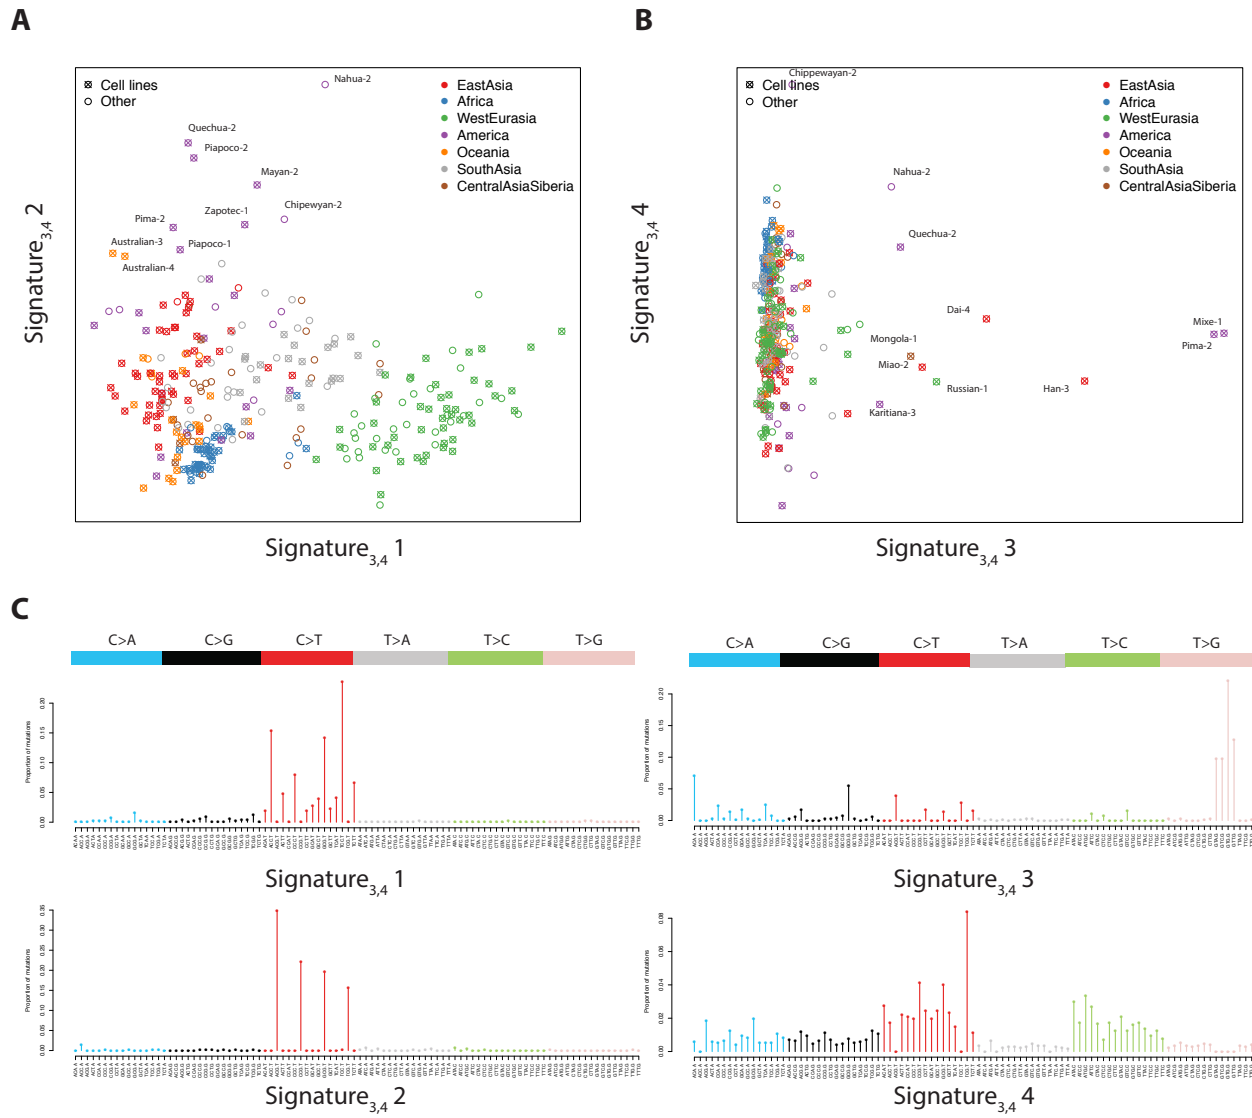

401

402 **Supplementary Figure 3:** Mutational signatures inferred from  $f_3$  variants with rank 4. **A:** Factor coefficients for  
403 signature<sub>3,4</sub> 1 and 2 – compare with Figure 1A. **B:** Factor coefficients for signature<sub>3,4</sub> 3 and 4 – compare with  
404 Supplementary Figure 2A. **C:** Mutational signatures<sub>3,4</sub> 1-4 – compare with Figure 1 C and D, and Supplementary  
405 Figure 2 C and D.

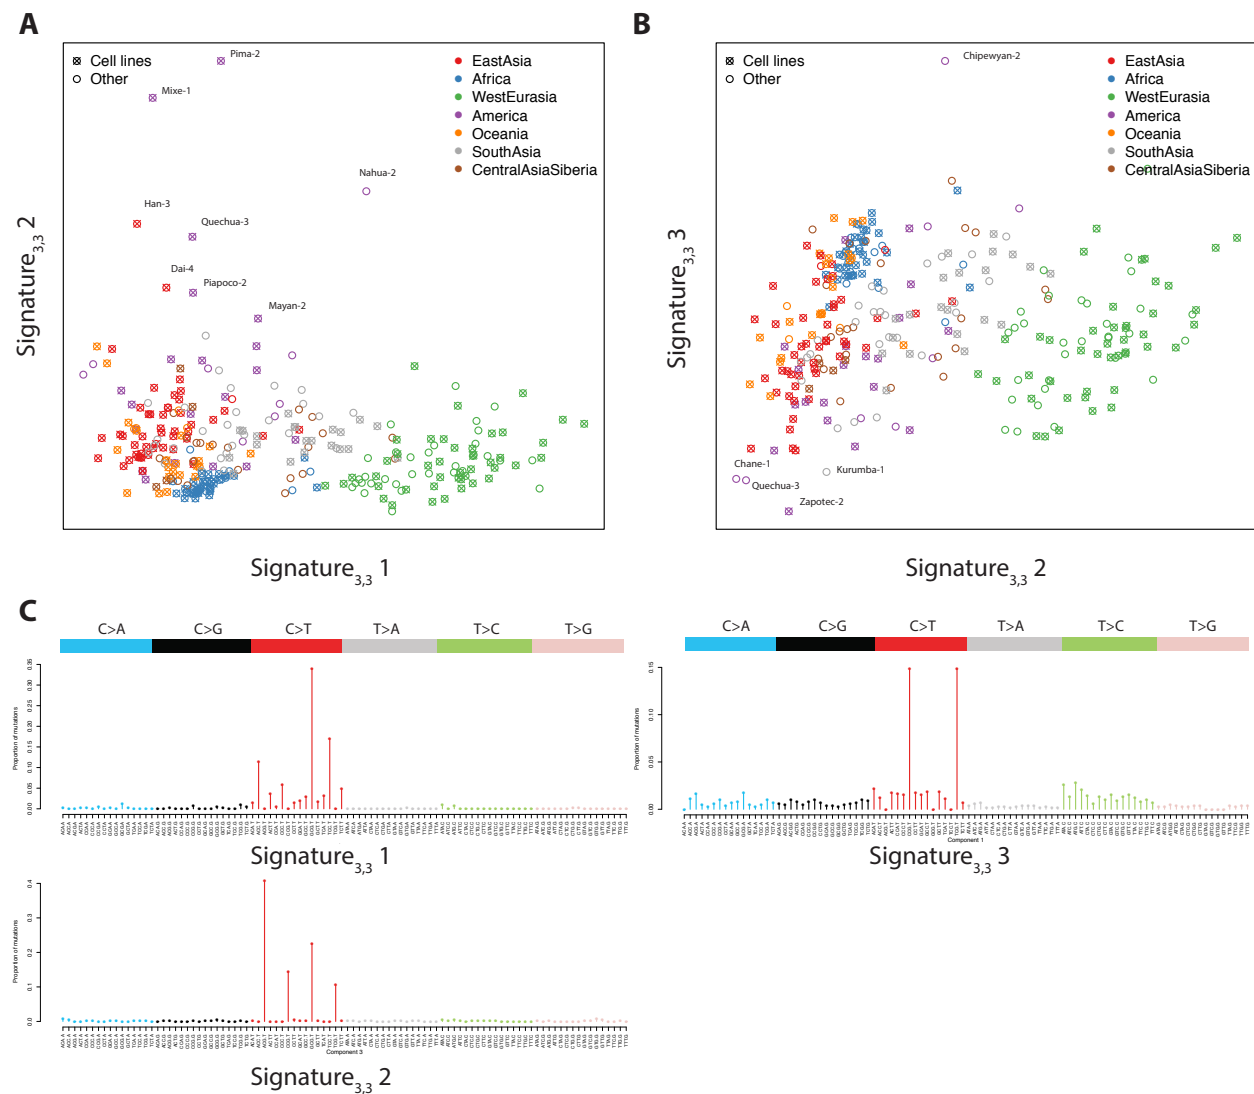

406

407 **Supplementary Figure 4:** Mutational signatures inferred from  $f_3$  variants with rank 3. **A:** Factor coefficients for

408 signature<sub>3,3</sub> 1 and 2. **B:** Factor coefficients for signature<sub>3,3</sub> 3 and. **C:** Mutational signatures<sub>3,3</sub> 1-3.

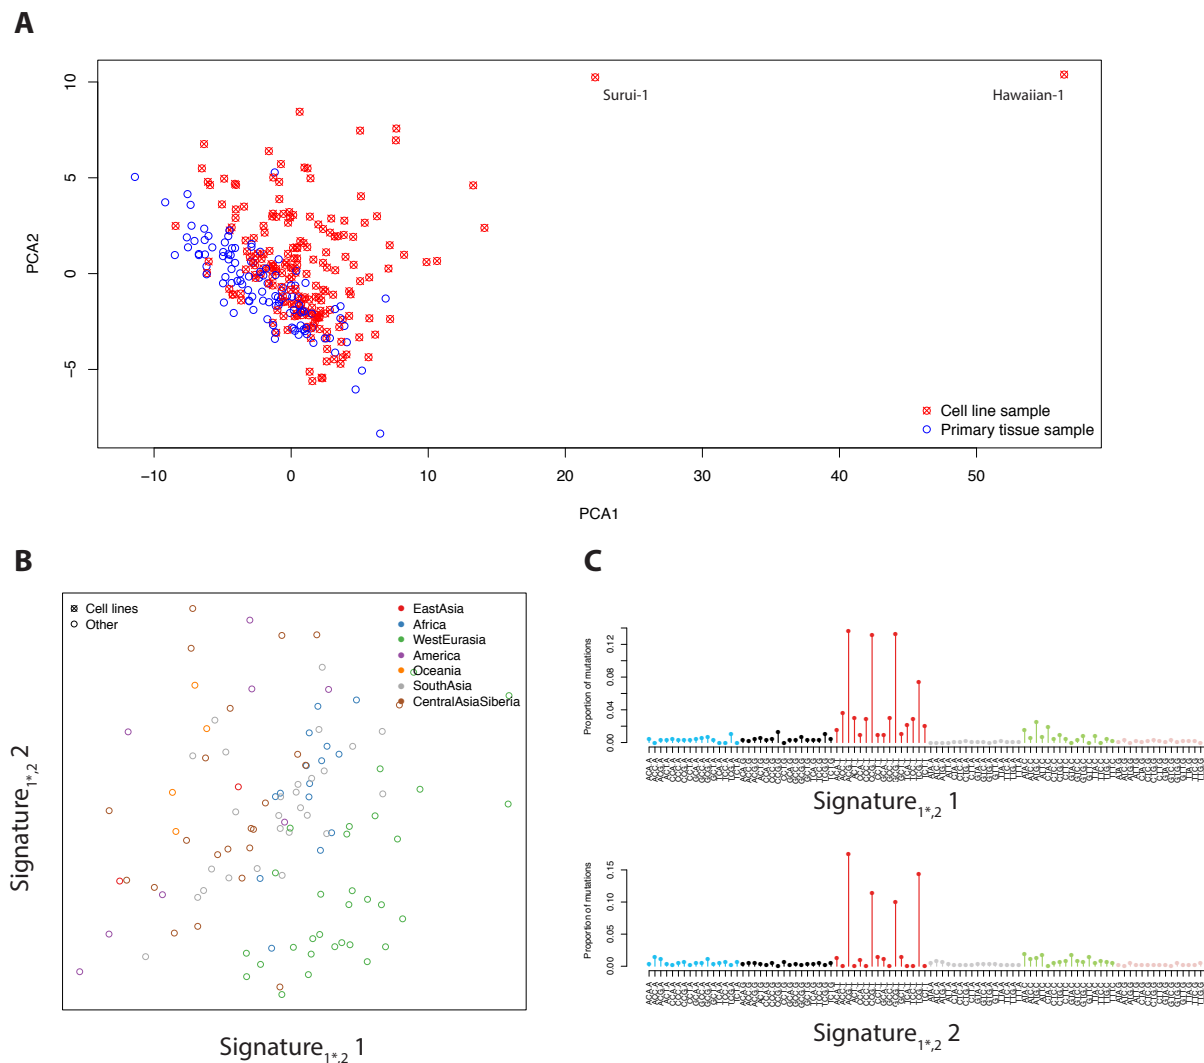

409

410

411 **Supplementary Figure 5:** Analysis of  $f_1$  variants **A:** The first two principal components of the mutational  
412 spectrum of  $f_1$  variants, showing the difference between cell line and primary tissue derived samples. **B&C:**  
413 Mutational signatures inferred from  $f_1$  variants with rank 2, but excluding cell line samples. **B:** Factor loadings for  
414 signature $_{1*2}$  1 and 2 (asterisk denotes no cell lines). **C:** Mutational signatures $_{1*2}$  1 and 2. Signature $_{1*2}$  1 is  
415 confounded with CpG mutations in this case, but clearly shows an elevated level of TCC>T and ACC>T  
416 mutations.

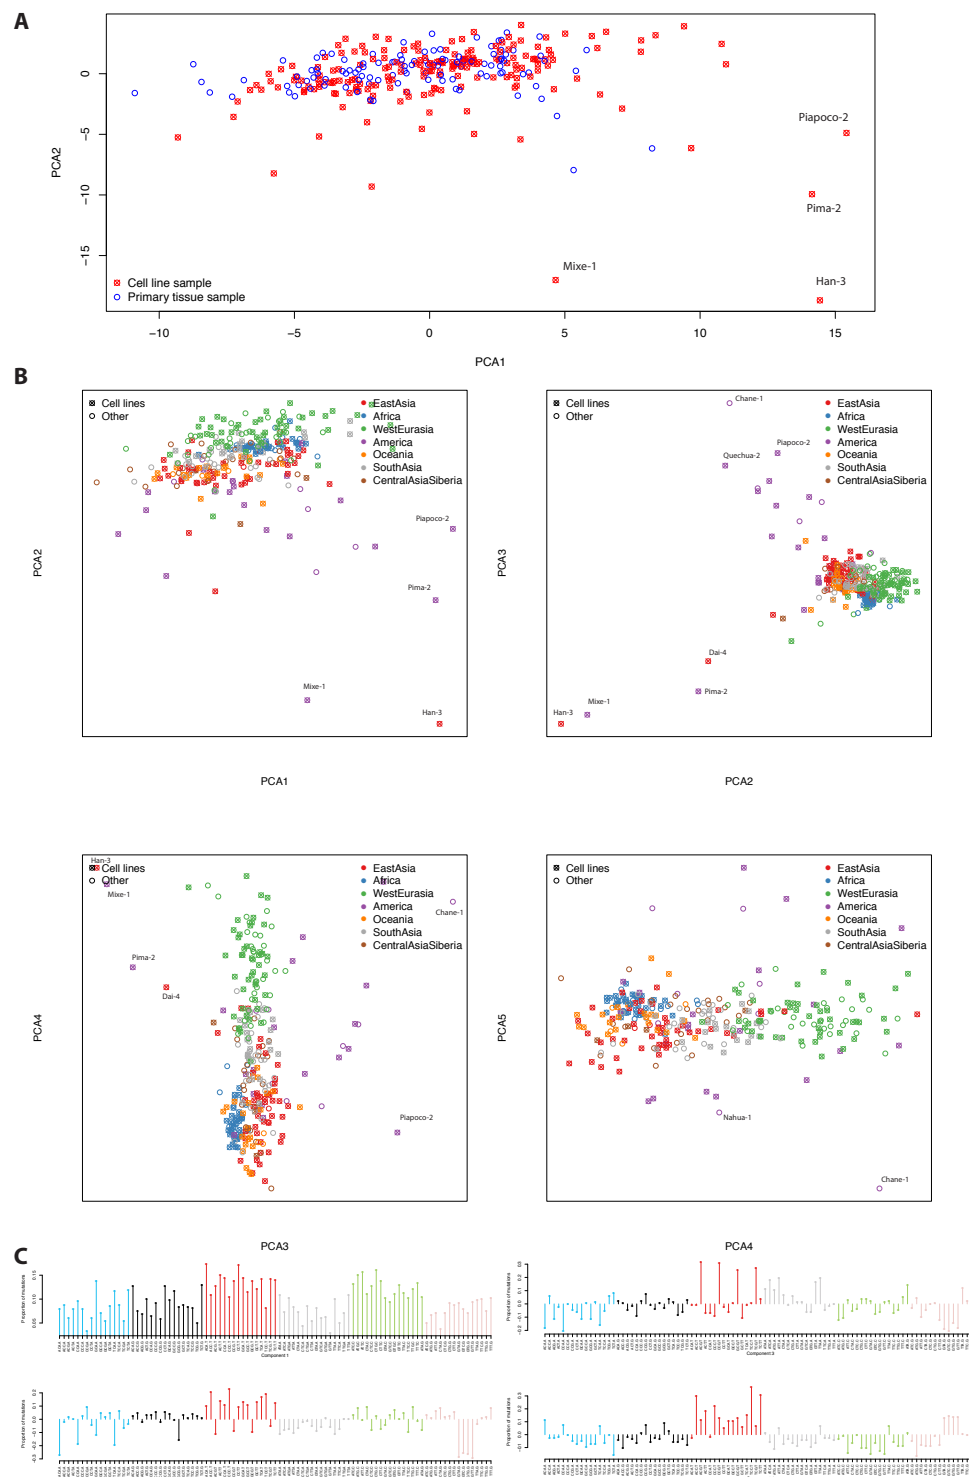

417

418 **Supplementary Figure 6:** Principal component analysis of the mutational spectrum of  $f_2$  variants. **A&B:**

419 Principal component positions. Labeled by sample source (A) and geographic region (B). **C:** Component loadings.

420 Note that principal components 2,3 and 4 correspond roughly to mutational signatures<sub>2,4</sub> 3, 2 and 1 respectively.



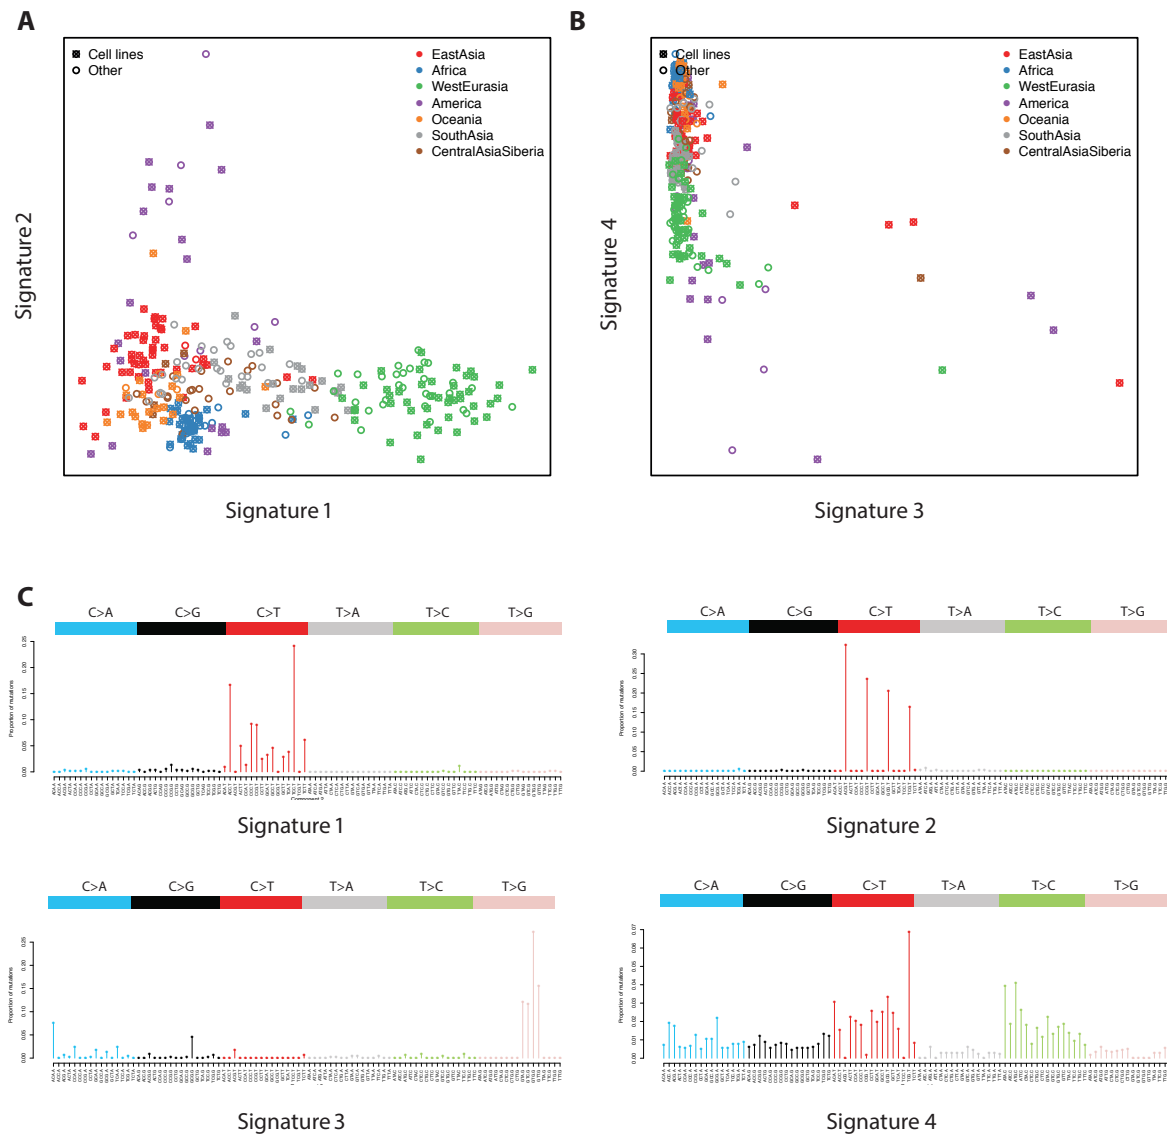

421

422 **Supplementary Figure 7:** NMF analysis of f2 variants at rank 4 - as the main analysis, but normalizing the

423 mutational spectra by the total number of mutations in each sample, rather than the number of ATA>C mutations.

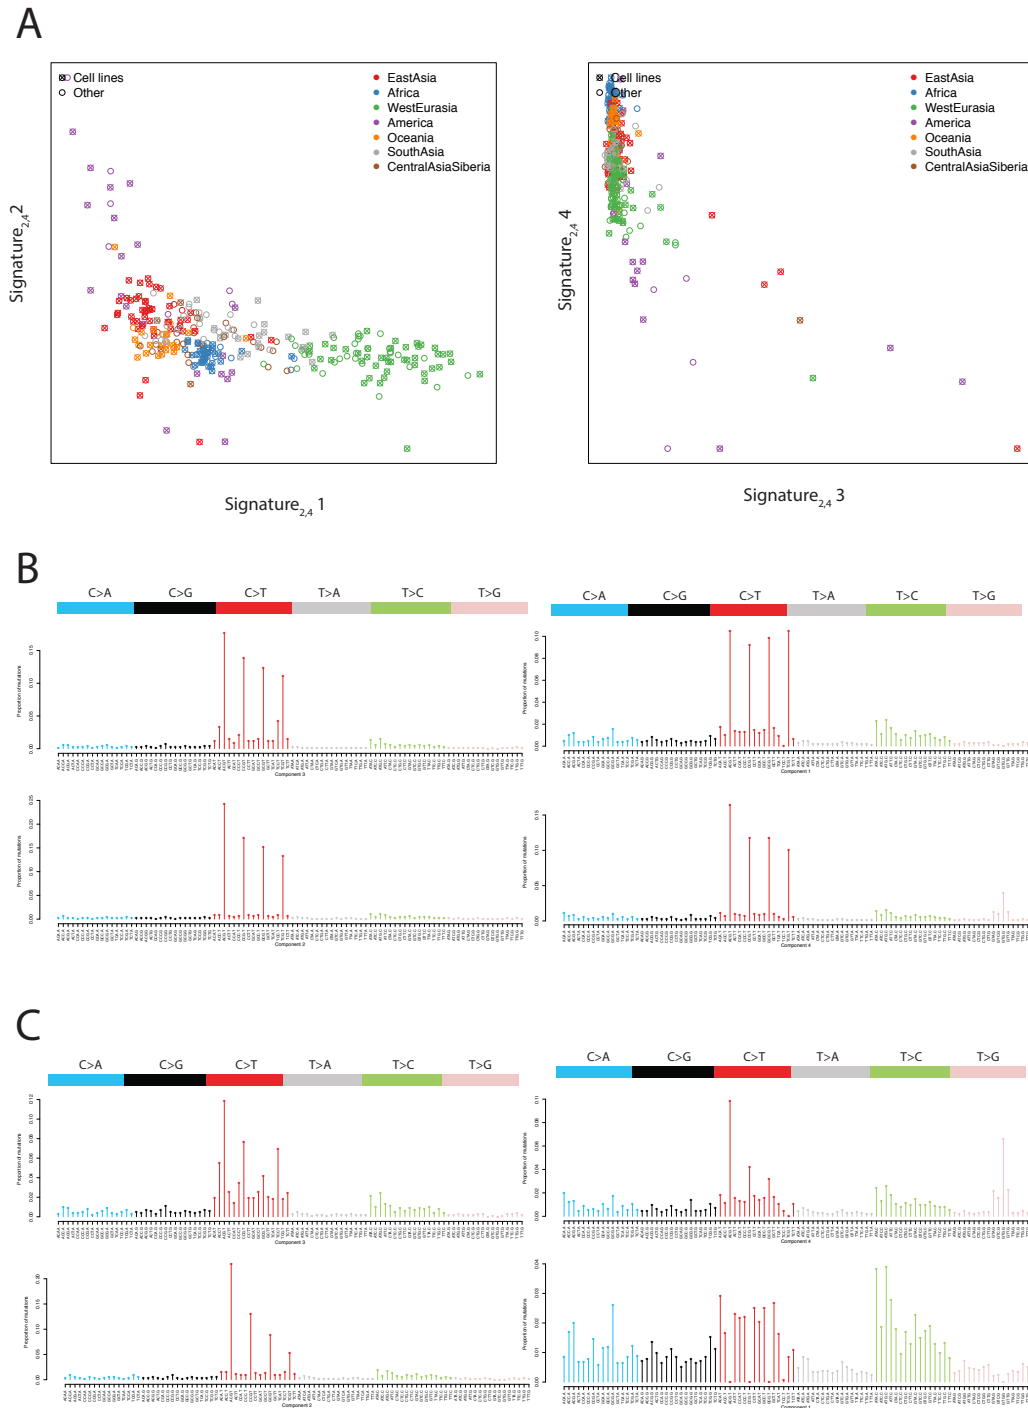

424

425 **Supplementary Figure 8:** NMF analysis of  $f_2$  variants at rank 4 with random initialization of the NMF algorithm.

426 **A:** Distribution of signatures across samples. **B:** Mutational signatures 1-4 (starting top left, anticlockwise). **C:**

427 Mutational signatures 1-4 where, for each CpG mutation class, we subtracted the minimum over all four

428 signatures from the signature.
